# Supplementary material
Source: Springer Nature journal article supplement (https://www.springermedizin.de/resource/supplementary/12961_2009_131_MOESM2_ESM.pdf/9571602)
Supplement: MOESM2 [file 9571602]

## Biomedical/Socio-behavioural/Health-system Research

Building Knowledge Base

Develop/test efficacy of potential/novel/innovative interventions and test the feasibility of implementation

Develop/test appropriate operational systems, acceptability of interventions and assess cost-effectiveness and sustainability in real programme environment

Advocacy and technical assistance to facilitate translation of research into programme and policy and analyse the outcomes

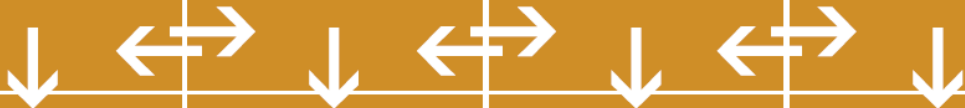

ICDDR,B  
Infrastructure

(Hospital, Matlab  
Laboratory & Field Sites)

ICDDR,B  
Infrastructure

(Hospital, Matlab  
Laboratory & Field Sites)

GoB/NGO/Private  
Sector Healthcare  
Programmes

National  
Programme
